# Supplementary material
Source: PubMed Central journal article supplement (PMC2646823)
Supplement: 08_110_Mas_Suppl.pdf [file 08_110_Mas_Suppl.pdf]

## **Additional file 1 – Supplemental Data**

**Quality Control.** The quality of the total cellular RNA isolated was assessed by examining RNA purity by spectrophotometer as the absorbance at 260, 270 and 280 nm, and estimating the  $A_{260}:A_{280}$  and  $A_{260}:A_{270}$  ratios. In addition, RNA integrity was assessed by Agilent Bioanalyzer by estimating the *28S:18S* rRNA ratios as the sum of both rRNA peaks as a proportion of all RNA, the percent rRNA, and RNA integrity number (RIN). Quality assessment of each GeneChip was performed by assessing the average background, scaling factor, percent present calls, the 3':5' ratio for GAPDH,  $\beta$ -actin, and ISGF, and the overall 3':5' ratio with associated 95% confidence interval. Classical multidimensional scaling (MDS) was applied to the standardized QC variables and the resulting two-dimensional MDS plot to determine whether any chips had outlying quality.

*Quality control.* RNA samples met all of the quality control criteria for sample preparation. cDNA synthesis and IVT were checked in all the samples showing results in concordance with the pre-established quality control criteria. Average background intensity and percent of probe sets called Present were consistent across the set of GeneChips. The 3' to 5' prime ratios for GAPDH and  $\beta$ -actin were consistently close to 1.0 indicating high quality RNA. No microarray was eliminated due to quality concerns.

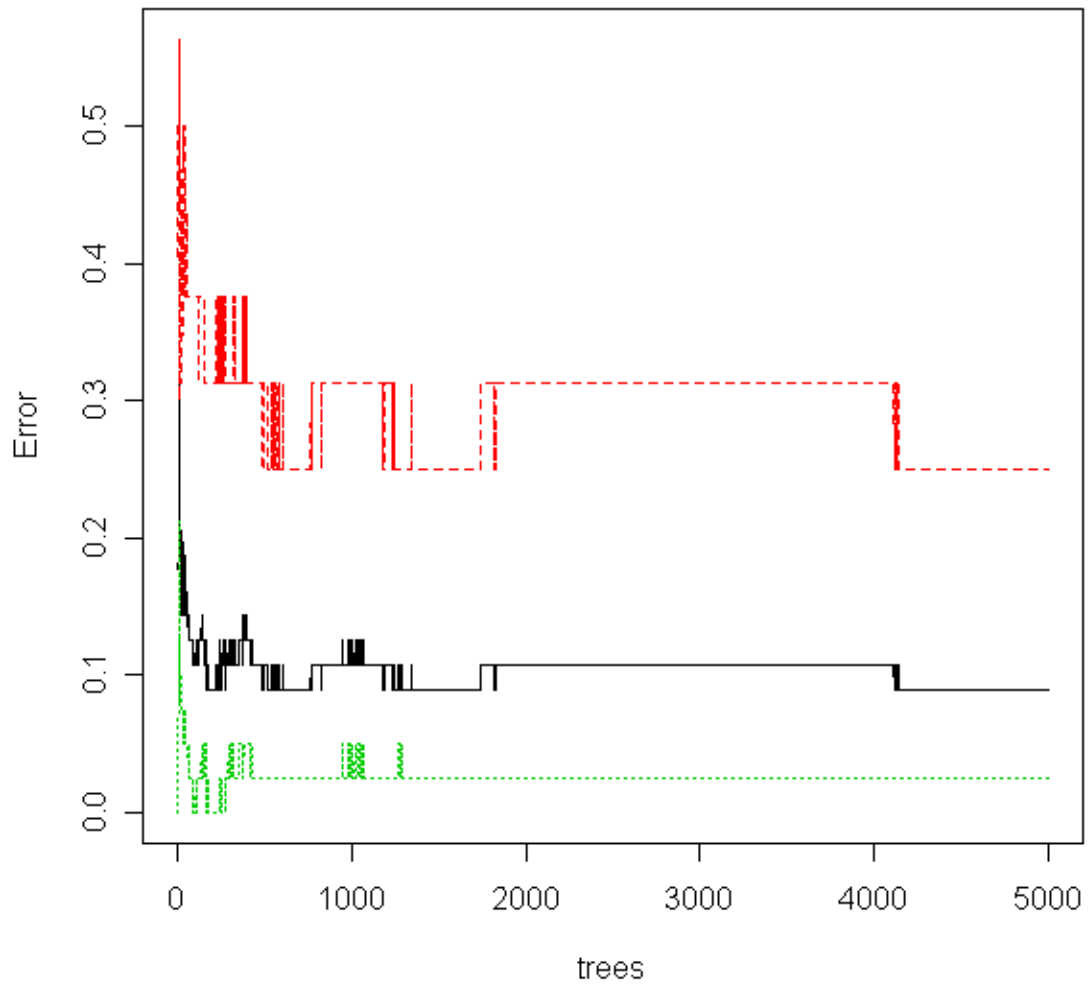

**Supplemental Figure-1:** Unbiased error estimates (black line) with 95% interval (red and green lines) obtained using the out of bootstrap observations are plotted as the number of trees included in the random forest ranged from 1 to 5,000. Final error estimate was 8.93%.

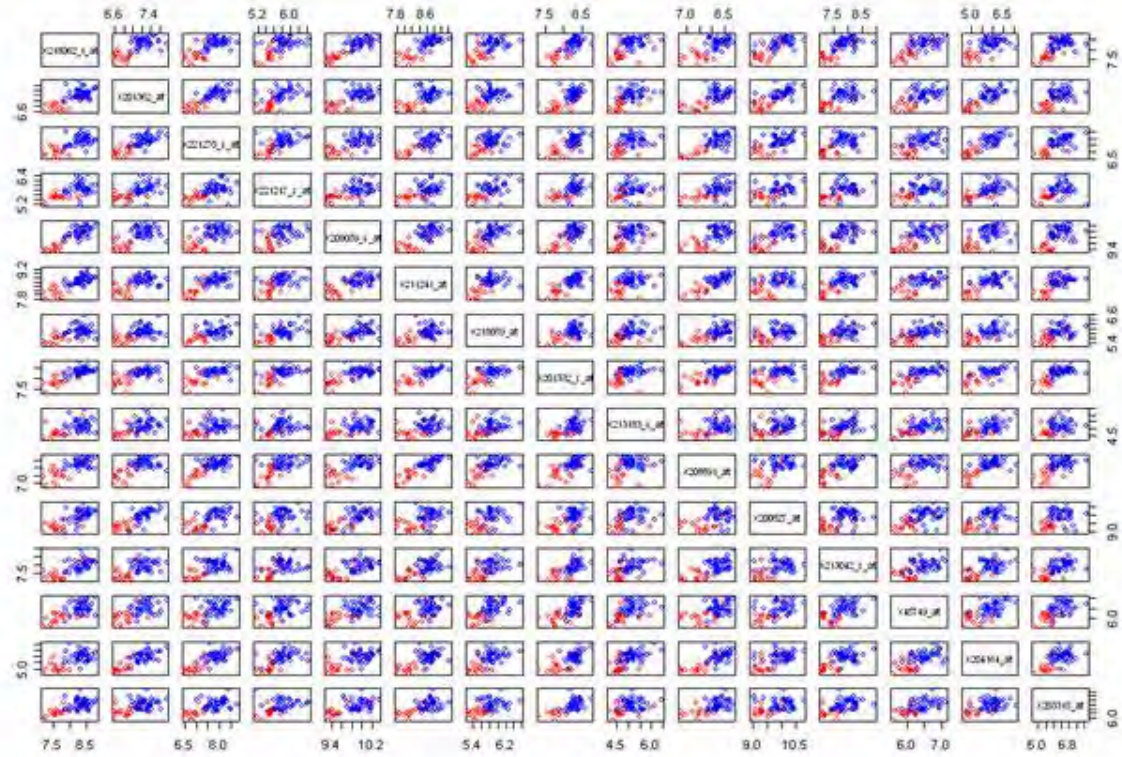

**Supplemental Figure-2:** Pairwise scatterplot for these 15 probe sets revealed that all probe sets were correlated, with the cirrhotic tissues with HCC having lower expression values (red) than the cirrhotic tissues without HCC (blue).

**Supplemental Table I.** Characteristics of the studied tissues

A) Tumor samples

| Sample ID | Tumor size, number, |                                | TNM Stage |
|-----------|---------------------|--------------------------------|-----------|
|           | location            | Tumor grade                    |           |
| 1-HCCTS   | 4.3-R               | moderately differentiated      | T4N0M0    |
| 2-HCCTS   | 2.2-R               | moderately differentiated      | T2N0M0    |
| 3-HCCTS   | 4.2-R               | moderately differentiated      | T3N0M0    |
| 4-HCCTS   | 2-R,1.5-R           | moderately differentiated      | T2N0M0    |
| 5-HCCTS   | 4R                  | moderately differentiated      | T2N0M0    |
| 6-HCCTS   | 4.3L                | well differentiated            | T3N0M0    |
| 7-HCCTS   | 4-L, 6.5-R, 3.8-R   | moderately differentiated      | T4N0M0    |
| 8-HCCTS   | 2.3-R               | well differentiated            | T2N0M0    |
| 9-HCCTS   | 2.3 -R              | moderately differentiated      | T2N0M0    |
| 10-HCCTS  | 3.3-R               | moderately differentiated      | T2N0M0    |
| 11-HCCTS  | 3-L                 | moderately differentiated      | T2N0M0    |
| 12-HCCTS  | 6.2-R               | well differentiated            | T3N0M0    |
| 13-HCCTS  | 4.3-R               | moderately differentiated      | T2N0M0    |
| 14-HCCTS  | 1.0-R               | moderately differentiated      | T1N0M0    |
| 15-HCCTS  | 3.3-L               | well/moderately differentiated | T2N0M0    |
| 16-HCCTS  | 5.0- L              | moderately diffused            | T3N0M0    |
| 17-HCCTS  | 3.0-L               | moderately differentiated      | T3N0M0    |
| 18-HCCTS  | 3.0-R               | low grade                      | T2N0M0    |
| 19-HCCTS  | 2.0-L               | well differentiated            | T1N0M0    |
| 20-HCCTS  | 5.3-L               | moderately differentiated      | T4N0M1    |
| 21-HCCTS  | 3.0-L               | moderately differentiated      | T3N0M0    |
| 22-HCCTS  | 2.7-R,1.7-R,0.9-L   | moderately differentiated      | T3N0M0    |
| 23-HCCTS  | 5.2-R,1.0-R         | moderately differentiated      | T3N0M0    |

|          |                    |                           |        |
|----------|--------------------|---------------------------|--------|
| 24-HCCTS | 3.8-R              | moderately differentiated | T2N0M0 |
| 25-HCCTS | 4.5-R              | moderately differentiated | T2N0M0 |
| 26-HCCTS | 2.3-R              | moderately diffused       | T2N0M0 |
| 27-HCCTS | 4.8-R,1.9-L        | modertely differentiated  | T4N0M1 |
| 28-HCCTS | 1.5-R              | well differentiated       | T4N0M0 |
| 29-HCCTS | 2.2-R              | moderately differentiated | T2N0M0 |
|          |                    | well to moderately        |        |
| 30-HCCTS | 2.2-R              | differentiated            | T2N0M0 |
| 31-HCCTS | 1.0-R,2.0-L        | moderately differentiated | T2N0M0 |
| 32-HCCTS | 1.5-R,3-9R         | moderately differentiated | T2N0M0 |
| 33-HCCTS | 1.3-L,1.5-R, 1.3-R | moderately differentiated | T4N0M0 |
| 34-HCCTS | 5.5-L, 1.2-R       | well differentiated       | T4NOM1 |
| 35-HCCTS | 1.0 R              | moderately differentiated | T1N0M0 |
| 36-HCCTS | 1.0-R              | well differentiated       | T1N0M0 |
| 37-HCCTS | 2.6-R              | moderately differentiated | T2N0M0 |
| 38-HCCTS | 2.0-R              | well differentiated       | T2N0M0 |
|          |                    | well to moderately        |        |
| 39-HCCTS | 1.6-R,1.4-L        | differentiated            | T2N0M0 |
| 40-HCCTS | 5.2-L              | moderately diffuse        | T3N0M0 |
| 41-HCCTS | 1.9-R,1.7-R        | well differentiated       | T2N0M0 |
|          |                    | well to moderately        |        |
| 42-HCCTS | 4.1-R,1.6-L        | differentiated            | T4N0M1 |
| 43-HCCTS | 1.7/1.7R/1.2L      | well differentiated       | T4N0M1 |
| 44-HCCTS | 4.0-R,1.0-R,1.0-R  | high grade HCC            | T4N0M1 |
| 45-HCCTS | 1.4/1.7L           | moderately differentiated | T4N0M1 |
| 46-HCCTS | 2.0-R              | high grade HCC            | T2N0M0 |
| 47-HCCTS | 2.2-R              | moderately differentiated | T2N0M0 |

B) HCV Cirrhotic tissues

| <b>Sample ID</b> | <b>HCV (+)</b> | <b>HCC</b> | <b>Matched tumor tissue</b> | <b>Ishak grade</b> | <b>Knodell score</b> |
|------------------|----------------|------------|-----------------------------|--------------------|----------------------|
| 1-CT             | Yes            | Yes        | yes                         | 6                  | 11                   |
| 2-CT             | Yes            | Yes        | yes                         | 6                  | 14                   |
| 3-CT             | Yes            | Yes        | yes                         | 6                  | 12                   |
| 4-CT             | Yes            | No         | N/A                         | 6                  | 15                   |
| 5-CT             | Yes            | Yes        | no                          | 6                  | 13                   |
| 6-CT             | Yes            | No         | N/A                         | 6                  | 14                   |
| 7-CT             | Yes            | Yes        | yes                         | 6                  | 11                   |
| 8-CT             | Yes            | No         | N/A                         | 6                  | 12                   |
| 9-CT             | Yes            | No         | N/A                         | 6                  | 13                   |
| 10-CT            | Yes            | No         | N/A                         | 6                  | 9                    |
| 11-CT            | Yes            | No         | N/A                         | 6                  | 9                    |
| 12-CT            | Yes            | No         | N/A                         | 6                  | 10                   |
| 13-CT            | Yes            | No         | N/A                         | 6                  | 13                   |
| 14-CT            | Yes            | No         | N/A                         | 6                  | 11                   |
| 15-CT            | Yes            | No         | N/A                         | 6                  | 10                   |
| 16-CT            | Yes            | No         | N/A                         | 6                  | 12                   |
| 17-CT            | Yes            | No         | N/A                         | 6                  | 11                   |
| 18-CT            | Yes            | No         | N/A                         | 6                  | 13                   |
| 19-CT            | Yes            | Yes        | yes                         | 6                  | 11                   |
| 20-CT            | Yes            | Yes        | yes                         | 6                  | 11                   |
| 21-CT            | Yes            | No         | N/A                         | 6                  | 11                   |
| 22-CT            | Yes            | No         | N/A                         | 6                  | 9                    |
| 23-CT            | Yes            | Yes        | yes                         | 6                  | 11                   |
| 24-CT            | Yes            | Yes        | no                          | 6                  | 9                    |

|       |     |     |     |   |    |
|-------|-----|-----|-----|---|----|
| 25-CT | Yes | No  | N/A | 6 | 13 |
| 26-CT | Yes | Yes | yes | 6 | 9  |
| 27-CT | Yes | No  | N/A | 6 | 9  |
| 28-CT | Yes | No  | N/A | 6 | 13 |
| 29-CT | Yes | No  | N/A | 6 | 11 |
| 30-CT | Yes | Yes | yes | 6 | 11 |
| 31-CT | Yes | No  | N/A | 6 | 12 |
| 32-CT | Yes | No  | N/A | 6 | 9  |
| 33-CT | Yes | No  | N/A | 6 | 12 |
| 34-CT | Yes | No  | N/A | 6 | 11 |
| 35-CT | Yes | No  | N/A | 6 | 7  |
| 36-CT | Yes | No  | N/A | 6 | 7  |
| 37-CT | Yes | No  | N/A | 6 | 12 |
| 38-CT | Yes | No  | N/A | 6 | 7  |
| 39-CT | Yes | No  | N/A | 6 | 11 |
| 40-CT | Yes | No  | N/A | 6 | 11 |
| 41-CT | Yes | No  | N/A | 6 | 11 |
| 42-CT | Yes | No  | yes | 6 | 9  |
| 43-CT | Yes | No  | N/A | 6 | 9  |
| 44-CT | Yes | No  | N/A | 6 | 11 |
| 45-CT | Yes | Yes | yes | 6 | 9  |
| 46-CT | Yes | Yes | yes | 6 | 9  |
| 47-CT | Yes | No  | N/A | 6 | 14 |
| 47-CT | Yes | No  | N/A | 6 | 12 |
| 48-CT | Yes | No  | N/A | 6 | 12 |
| 49-CT | Yes | Yes | yes | 6 | 11 |
| 50-CT | Yes | Yes | yes | 6 | 13 |
| 51-CT | Yes | Yes | yes | 6 | 12 |

|       |     |     |     |   |    |
|-------|-----|-----|-----|---|----|
| 52-CT | Yes | No  | N/A | 6 | 11 |
| 53-CT | Yes | Yes | no  | 6 | 12 |
| 54-CT | Yes | No  | N/A | 6 | 12 |
| 55-CT | Yes | No  | N/A | 6 | 11 |
| 56-CT | Yes | No  | N/A | 6 | 11 |
| 57-CT | Yes | No  | N/A | 6 | 14 |
| 58-CT | Yes | Yes | yes | 6 | 12 |



**Supplemental Table II.** Seventeen unique probe sets differentially expressed in HCV-HCC samples when compared with HCV cirrhotic tissues from patients with HCC.

| <b>AffyID</b> | <b>Symbol</b> | <b>Gene Name</b>                                                                 | <b>HCV-Cirrhosis</b> | <b>HCV-HCC</b> | <b>Fold change</b> |
|---------------|---------------|----------------------------------------------------------------------------------|----------------------|----------------|--------------------|
| 200055_at     | TAF10         | TAF10 RNA polymerase II, TATA box binding protein (TBP)-associated factor, 30kDa | 8.83                 | 9.46           | 1.55               |
| 201917_s_at   | SLC25A36      | solute carrier family 25, member 36                                              | 7.16                 | 5.96           | -2.30              |
| 202600_s_at   | NRIP1         | nuclear receptor interacting protein 1                                           | 9.62                 | 7.89           | -3.32              |
| 202984_s_at   | BAG5          | BCL2-associated athanogene 5                                                     | 5.40                 | 4.76           | -1.56              |
| 204408_at     | APEX2         | APEX nuclease (apurinic/apyrimidinic endonuclease) 2                             | 5.92                 | 6.29           | 1.29               |
| 204713_s_at   | F5            | coagulation factor V (proaccelerin, labile factor)                               | 11.05                | 9.71           | -2.53              |
| 205171_at     | PTPN4         | protein tyrosine phosphatase, non-receptor type 4 (megakaryocyte)                | 6.37                 | 5.60           | -1.71              |

|             |          |                                                                                          |      |       |       |
|-------------|----------|------------------------------------------------------------------------------------------|------|-------|-------|
| 208994_s_at | PPIG     | peptidylprolyl isomerase G<br>(cyclophilin G)                                            | 8.02 | 7.37  | -1.57 |
| 212106_at   | UBXD8    | UBX domain containing 8                                                                  | 7.31 | 6.64  | -1.59 |
| 212634_at   | KIAA0776 | KIAA0776                                                                                 | 7.76 | 6.66  | -2.14 |
| 212758_s_at | ZEB1     | zinc finger E-box binding<br>homeobox 1                                                  | 7.64 | 6.69  | -1.93 |
| 214679_x_at | GNA11    | guanine nucleotide binding<br>protein (G protein), alpha 11<br>(Gq class)                | 6.41 | 6.91  | 1.41  |
| 214723_x_at | KIAA1641 | KIAA1641                                                                                 | 5.61 | 4.55  | -2.08 |
| 215447_at   | TFPI     | tissue factor pathway<br>inhibitor (lipoprotein-<br>associated coagulation<br>inhibitor) | 7.02 | 5.92  | -2.14 |
| T216022_at  |          | NA                                                                                       | 5.01 | 4.21  | -1.74 |
| 216775_at   | USP53    | ubiquitin specific peptidase<br>53                                                       | 4.22 | 3.85  | -1.29 |
| 218213_s_at | C11orf10 | chromosome 11 open<br>reading frame 10                                                   | 9.65 | 10.26 | 1.53  |
